# Supplementary material
Source: MDPI journal article supplement (https://www.mdpi.com/2073-4344/9/6/558)
Supplement: s1 [file s1]

# Supplementary Materials: Oxygen Vacancy Enhanced Photoreduction Cr(VI) on Few-Layers BiOBr Nanosheets

Yin Peng, Pengfei Kan, Qian Zhang and Yinghua Zhou

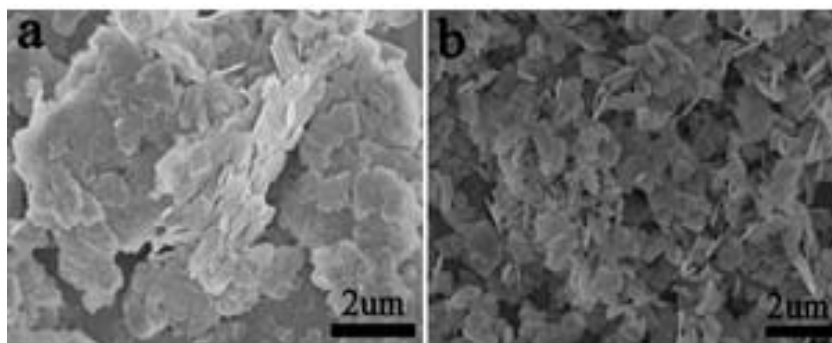

**Figure S1.** SEM images of the obtained BiOBr (a) and BiOBr-Ov (b) samples.

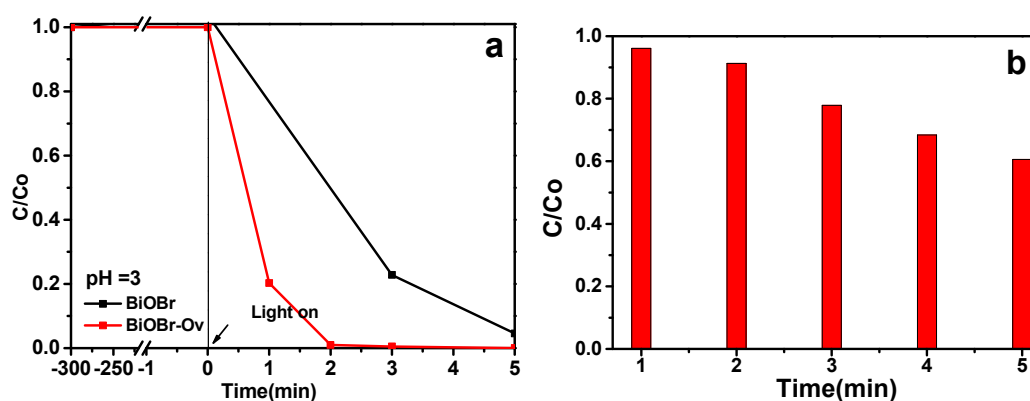

**Figure S2.** (a) The photocatalytic reduction curve of Cr(VI) (30 mg/L) and (b) Cycling times of the photoreduction of Cr(VI) under solar light irradiation.

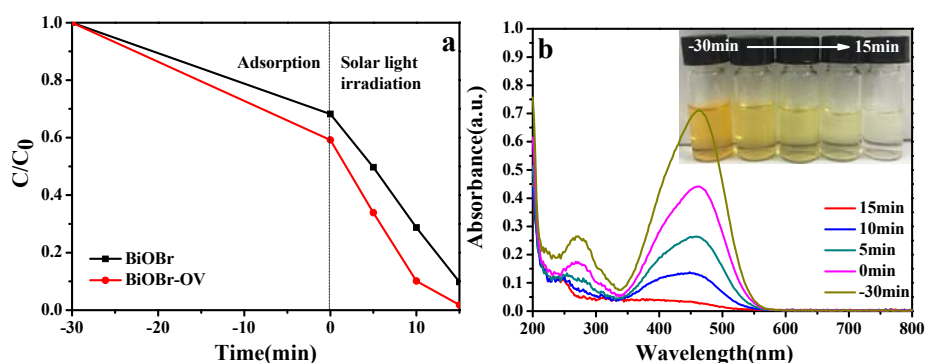

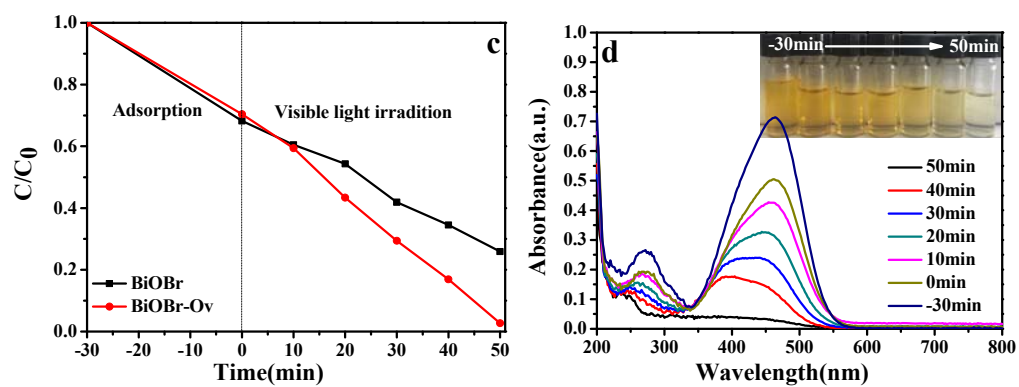

**Figure S3.** (a,c) The Photocatalytic degradation curve of MO (10 mg/L), and (b,d) UV-Vis absorption spectra of MO (10 mg/L) using BiOBr-OV as photocatalyst under visible/solar light irradiation.
